# Supplementary material for: A multicenter prospective cohort study to develop frailty-based prognostic criteria in heart failure patients (FLAGSHIP): rationale and design
Source: PubMed Central journal article supplement (PMC6090927; doi:10.1186/s12872-018-0897-y), 2018-08-02
Supplement: 12872_2018_897_MOESM1_ESM.pdf [file 12872_2018_897_MOESM1_ESM.pdf]

| Hospital                                                              | Review Board                                                                                         | Approval number<br>(if provided) |
|-----------------------------------------------------------------------|------------------------------------------------------------------------------------------------------|----------------------------------|
| Horakata Kohsai Hospital                                              | Ethics Committee of the Hirakata Kohsai Hospital                                                     |                                  |
| Gifu Heart Center                                                     | Ethics Committee of Gifu Heart Center                                                                |                                  |
| Kitano Hospital                                                       | Kitano Hospital Medical Research Institute Ethics Committee                                          | P16-06-013                       |
| Nagoya Tokushukai General Hospital                                    | Tokushukai Group Ethical Committee                                                                   | TGE00497-016                     |
| Nagoya Heart Center                                                   | Ethics Committee of Nagoya Heart Center                                                              |                                  |
| Aichi Medical University                                              | Ethics Committee , Aichi Medical University School of Medicine                                       | 15-036                           |
| Toyohashi Heart Center                                                | Ethics Committee of Toyohashi Heart Center                                                           | 160203                           |
| Kainan Hospital                                                       | Ethics Committee of Kainan Hospital                                                                  | 270619-03                        |
| Hoshi General Hospital                                                | Ethics Committee of Hoshi General Hospital                                                           | 43217                            |
| New Tokyo Hospital                                                    | Ethics Committee of New Tokyo Hospital                                                               |                                  |
| Gifu University Hospital                                              | Ethical Committee of Gifu University School of Medicine                                              | 27-138                           |
| Mie University Hospital                                               | Human Studies Subcommittee of Mie University<br>Graduate School of Medicine                          | 2924                             |
| Nagoya University Hospital                                            | Ethics committee of Nagoya University School of Medicine                                             | 2014-0421                        |
| Toyota Memorial Hospital                                              | Ethics and Privacy Protection Committee of Toyota Memorial Hospital                                  |                                  |
| Chubu Rosai Hospital                                                  | Ethics Committee of Chubu Rosai Hospital                                                             |                                  |
| Nakatsugawa Municipal Hospital                                        | Ethics Committee of Nakatsugawa Municipal Hospital                                                   |                                  |
| Ohta Nishinouchi Hospital                                             | Ethics Committee of Ohta General Hospital                                                            | 12                               |
| St. Marianna University School of Medicine<br>Yokohama Seibu Hospital | Institutional Review Board of St. Marianna University of School of Medicine                          | 3098                             |
| Kyushu Hospital                                                       | Committee on Ethics of Clinical Research, Japan Community Healthcare Organization Kyushu<br>Hospital | 397                              |
| St. Marianna University School of Medicine<br>Toyoko Hospital         | Institutional Review Board of St. Marianna University of School of Medicine                          | 3098                             |
| Miyakonojo Medical Association Hospital                               | Ethics Committee of Miyakonojo Medical Association Hospital                                          | 27-1                             |
| Inazawa Municipal Hospital                                            | Ethics Committee of Inazawa Municipal Hospital                                                       | 2                                |
| Tosei General Hospital                                                | Institutional review board of Tosei General Hospital                                                 | 512                              |
| Fujita Health University Banbuntane<br>Hotokukai Hospital             | Fujita Health University Ethical Review Board for Epidemiological<br>and Clinical Studies            | 15-259                           |
| Hokko Memorial Hospital                                               | Ethics Committee of Hokko Memorial Hospital                                                          | 28-1                             |
| Kobe Century Memorial Hospital                                        | Ethics Committee of Kobe Century Memorial Hospital                                                   |                                  |
| Chikamori Hospital                                                    | Ethics Committee of Chikamori Hospital                                                               | 173                              |
| St. Marianna School of Medicine Hospital                              | Institutional Review Board of St. Marianna University of School of Medicine                          | 3098                             |
| Nagoya Ekisaikai Hospital                                             | Human (ethics) subjects committee of Ekisaikai Hospital                                              | 2016-055                         |
| Ogaki Municipal Hospital                                              | Ethics Committee of Ogaki Municipal                                                                  | 20160128-4                       |
